# Supplementary material for: Which Occupation is Highly Associated with Cognitive Impairment? A Gender-Specific Longitudinal Study of Paid and Unpaid Occupations in South Korea
Source: MDPI journal article supplement (doi:10.3390/ijerph17217749), 2020-10-23
Supplement: s1 [file s1]

# Supplementary File

**Table S1.** Sample characteristics at waves 2 to 7 by gender.

| Characteristics                                             | Men              |                  |                  |                  |                  |                  | Women            |                  |                  |                  |                  |                  |
|-------------------------------------------------------------|------------------|------------------|------------------|------------------|------------------|------------------|------------------|------------------|------------------|------------------|------------------|------------------|
|                                                             | Wave 2<br>(2008) | Wave 3<br>(2010) | Wave 4<br>(2012) | Wave 5<br>(2014) | Wave 6<br>(2016) | Wave 7<br>(2018) | Wave 2<br>(2008) | Wave 3<br>(2010) | Wave 4<br>(2012) | Wave 5<br>(2014) | Wave 6<br>(2016) | Wave 7<br>(2018) |
| Cognitive function <sup>a</sup> : mean (SD)<br><sup>b</sup> | 27.9<br>(2.5)    | 27.9<br>(2.8)    | 28.0<br>(2.7)    | 28.0<br>(2.8)    | 28.1<br>(2.6)    | 27.8<br>(3.5)    | 27.2<br>(3.1)    | 27.2<br>(3.1)    | 27.4<br>(3.0)    | 27.4<br>(3.1)    | 27.6<br>(3.0)    | 27.5<br>(3.1)    |
| Age, years: mean (SD) <sup>b</sup>                          | 55.3<br>(5.2)    | 56.5<br>(4.7)    | 57.5<br>(4.1)    | 58.5<br>(3.5)    | 59.6<br>(2.9)    | 60.6<br>(2.3)    | 54.8<br>(5.2)    | 56.1<br>(4.6)    | 57.2<br>(4.1)    | 58.3<br>(3.5)    | 59.3<br>(2.9)    | 60.3<br>(2.3)    |
| Non-married <sup>c</sup>                                    | 7.0%             | 6.7%             | 7.2%             | 6.7%             | 7.0%             | 8.6%             | 14.7%            | 13.8%            | 13.5%            | 13.8%            | 13.6%            | 13.8%            |
| Religion, yes                                               | 40.3%            | 36.5%            | 36.9%            | 31.3%            | 30.4%            | 28.1%            | 59.3%            | 57.0%            | 58.6%            | 50.2%            | 49.4%            | 42.6%            |
| Reside in rural area                                        | 20.0%            | 20.6%            | 20.1%            | 19.3%            | 18.5%            | 19.9%            | 19.7%            | 21.4%            | 20.7%            | 20.7%            | 19.9%            | 20.3%            |
| Educational level                                           |                  |                  |                  |                  |                  |                  |                  |                  |                  |                  |                  |                  |
| Elementary school or less                                   | 17.2%            | 15.0%            | 13.3%            | 11.1%            | 10.1%            | 9.4%             | 34.3%            | 32.2%            | 30.4%            | 26.6%            | 22.1%            | 19.2%            |
| Middle school or high school                                | 61.9%            | 64.3%            | 64.6%            | 64.6%            | 65.1%            | 66.1%            | 58.6%            | 60.5%            | 62.5%            | 65.7%            | 69.3%            | 71.2%            |
| College or higher                                           | 21.0%            | 20.7%            | 22.2%            | 24.2%            | 24.8%            | 24.5%            | 7.1%             | 7.3%             | 7.2%             | 7.8%             | 8.7%             | 9.6%             |
| Occupation                                                  |                  |                  |                  |                  |                  |                  |                  |                  |                  |                  |                  |                  |
| Homemakers                                                  | 10.1%            | 7.6%             | 7.7%             | 11.8%            | 6.9%             | 18.4%            | 40.1%            | 38.0%            | 36.8%            | 36.6%            | 35.5%            | 46.2%            |
| Unemployed                                                  | 4.2%             | 3.7%             | 3.4%             | 2.0%             | 2.9%             | 3.1%             | 4.1%             | 2.4%             | 2.8%             | 1.8%             | 2.1%             | 1.6%             |
| Retired                                                     | 7.8%             | 8.7%             | 10.5%            | 6.8%             | 11.0%            | 13.3%            | 13.4%            | 13.0%            | 15.9%            | 18.9%            | 19.3%            | 18.9%            |
| Managers                                                    | 7.4%             | 6.1%             | 6.0%             | 6.6%             | 6.2%             | 3.5%             | 0.5%             | 0.6%             | 0.7%             | 0.8%             | 0.9%             | 0.5%             |
| Professionals and related<br>workers                        | 7.9%             | 7.7%             | 7.2%             | 6.9%             | 6.5%             | 5.9%             | 2.7%             | 3.2%             | 3.2%             | 2.4%             | 2.3%             | 2.0%             |
| Clerks                                                      | 7.4%             | 7.2%             | 6.7%             | 6.4%             | 5.0%             | 3.8%             | 2.3%             | 2.2%             | 1.7%             | 1.7%             | 2.0%             | 1.8%             |
| Service workers                                             | 4.1%             | 4.3%             | 3.9%             | 4.2%             | 5.1%             | 4.1%             | 10.5%            | 10.6%            | 10.4%            | 10.2%            | 10.8%            | 9.3%             |
| Sales workers                                               | 6.8%             | 6.8%             | 6.3%             | 6.1%             | 6.1%             | 5.3%             | 8.0%             | 7.9%             | 7.3%             | 6.7%             | 6.4%             | 4.9%             |
| Skilled agricultural, forestry and<br>fishery workers       | 7.3%             | 7.9%             | 8.0%             | 7.1%             | 6.9%             | 5.4%             | 4.9%             | 5.7%             | 4.9%             | 4.6%             | 4.5%             | 3.4%             |
| Craft and related trades workers                            | 10.7%            | 11.4%            | 12.4%            | 13.1%            | 12.3%            | 12.2%            | 1.9%             | 2.2%             | 2.5%             | 2.1%             | 2.1%             | 2.0%             |
| Plant and machine operators and<br>assemblers               | 11.9%            | 12.5%            | 12.4%            | 12.4%            | 12.8%            | 10.9%            | 1.2%             | 1.1%             | 1.2%             | 1.4%             | 1.3%             | 1.2%             |
| Elementary workers and armed<br>forces                      | 14.7%            | 16.2%            | 15.7%            | 16.6%            | 18.3%            | 14.1%            | 10.4%            | 13.1%            | 12.7%            | 12.9%            | 13.0%            | 8.3%             |
| Household income <sup>d</sup>                               |                  |                  |                  |                  |                  |                  |                  |                  |                  |                  |                  |                  |

|                                      |       |       |       |       |       |       |       |       |       |       |       |       |
|--------------------------------------|-------|-------|-------|-------|-------|-------|-------|-------|-------|-------|-------|-------|
| Lower half                           | 46.0% | 47.6% | 46.1% | 46.5% | 45.5% | 44.7% | 52.6% | 53.7% | 52.9% | 53.7% | 55.2% | 54.9% |
| Higher half                          | 53.2% | 52.1% | 53.7% | 53.4% | 54.5% | 54.9% | 46.5% | 46.2% | 47.0% | 45.8% | 44.7% | 44.9% |
| Unreported                           | 0.9%  | 0.3%  | 0.2%  | 0.1%  |       | 0.3%  | 0.9%  | 0.2%  | 0.2%  | 0.5%  | 0.1%  | 0.2%  |
| House renter                         | 19.3% | 18.6% | 18.3% | 18.0% | 18.2% | 17.9% | 19.6% | 18.8% | 17.7% | 17.1% | 17.2% | 15.4% |
| Smoker, yes                          | 45.8% | 46.5% | 44.2% | 38.7% | 32.2% | 29.9% | 2.3%  | 2.3%  | 1.9%  | 1.6%  | 1.5%  | 1.2%  |
| Alcohol drinker, yes                 | 71.0% | 70.1% | 69.2% | 68.9% | 68.7% | 69.2% | 25.4% | 25.6% | 25.8% | 23.7% | 23.4% | 24.7% |
| Active routine physical exercise     | 41.1% | 37.8% | 39.4% | 33.7% | 37.8% | 34.1% | 39.9% | 37.9% | 38.6% | 34.6% | 37.2% | 35.4% |
| Obese <sup>e</sup>                   | 21.8% | 21.8% | 24.1% | 22.9% | 24.8% | 24.7% | 24.0% | 26.0% | 25.0% | 25.1% | 25.4% | 24.8% |
| Have chronic disease <sup>f</sup>    | 33.5% | 35.3% | 39.0% | 42.0% | 42.4% | 43.9% | 31.8% | 36.6% | 39.4% | 41.3% | 42.1% | 42.6% |
| Have depressive symptom <sup>g</sup> | 31.7% | 31.8% | 29.9% | 28.5% | 24.7% | 28.5% | 40.4% | 37.5% | 32.9% | 31.8% | 31.6% | 32.6% |
| Number of observations               | 1,945 | 1,550 | 1,253 | 1,023 | 802   | 608   | 2,409 | 1,957 | 1,631 | 1,367 | 1,122 | 871   |

<sup>a</sup> Cognitive function was based on the Korean Mini-Mental State Examination scores. <sup>b</sup> SD denotes standard deviation. <sup>c</sup> Non-married included never married, separated, widowed, or divorced. <sup>d</sup> Household income was adjusted for household size for each wave. <sup>e</sup> Obese was defined as the body mass index of at least 25. <sup>f</sup> Chronic diseases included hypertension, diabetes, stroke, angina, myocardial infarction, chronic pulmonary diseases, and any type of cancer. <sup>g</sup> Depressive symptom was defined as a score of 4 or more on the 10-item short form of the Center for Epidemiologic Studies Depression Scale.
